# Supplementary material for: Non-invasive real-time genomic monitoring of the critically endangered kākāpō
Source: eLife. 2023 Dec 28;12:RP84553. doi: 10.7554/eLife.84553 (PMC10754495; doi:10.7554/eLife.84553)
Supplement: Supplementary file 1. — Sample ID, Sample Type, Distance from the sampling site [m], Amount of soil sampled [ug], DNA concentration after DNA extraction [ug/ml], Date of extraction (i.e. extraction batch), and Sample label, which is used throughout the manuscript. [file elife-84553-supp1.xlsx]

## Sheet: Tabellenblatt1
Sample ID	Sample type	Distance [m]	Replicate number	Amount of soil [ug]	DNA concentration [ug/ml]	Date of extraction	Sample label
on1_1_2	old nest	0	2	238	149	2021-01-28	1
on1_1_3	old nest	0	3	258	494	2021-01-28	2
bw1_1_2	bowl	0	2	245	248	2021-01-28	3
bw1_1_3	bowl	0	3	250	252	2021-01-28	4
bw1_2_1	bowl	4	1	259	76.6	2021-01-28	5
bw1_2_2	bowl	4	2	261	99.8	2021-01-28	6
kaka2_1	kaka control	NA	1	255	180	2021-01-28	7
ct1	negative control	NA	NA	0	<0.010	2021-01-28	8
bw1_3_1	bowl	20	1	275	89.6	2021-02-02	9
bw1_3_2	bowl	20	2	270	110	2021-02-02	10
bw2_1_1	bowl	0	1	247	346	2021-02-02	11
bw2_1_2	bowl	0	2	278	326	2021-02-02	12
on2_1_2	old nest	0	2	260	81.6	2021-02-02	14
ct2	negative control	NA	NA	0	<0.010	2021-02-02	16
on1_1_2	old nest	0	2	275	258	2021-02-17	17
fs2_1_1	feeding stations	0	1	276	79.7	2021-02-17	18
fs2_1_2	feeding stations	0	2	217	221	2021-02-17	19
fs2_2_1	feeding stations	4	1	239	169	2021-02-17	20
fs2_2_2	feeding stations	4	2	201	124	2021-02-17	21
fs2_3_1	feeding stations	20	1	231	127	2021-02-17	22
fs2_3_2	feeding stations	20	2	237	87.3	2021-02-17	23
ct3	negative control	NA	NA	0	<0.010	2021-02-17	24
on2_1_1	old nest	0	1	250	104	2021-03-21	25
kea1	kea control	NA	1	251	398	2021-03-21	26
bw2_2_1	bowl	4	1	247	256	2021-03-21	27
bw2_2_2	bowl	4	2	237	190	2021-03-21	28
bw2_3_1	bowl	20	1	239	318	2021-03-21	29
bw2_3_2	bowl	20	2	247	400	2021-03-21	30
on1_2_1	old nest	4	1	250	69.6	2021-03-21	31
on1_2_2	old nest	4	2	247	119	2021-03-21	32
on1_3_1	old nest	20	1	242	256	2021-03-21	33
on1_3_2	old nest	20	2	248	184	2021-03-21	34
fs1_1_1	feeding stations	0	1	243	276	2021-03-21	35
fs1_1_2	feeding stations	0	2	249	254	2021-03-21	36
kaka2_2	kaka control	NA	2	249	244	2021-03-21	37
kea2	kea control	NA	2	244	400	2021-03-21	38
ct4	negative control	NA	NA	0	<0.010	2021-03-21	39
on2_2_1	old nest	4	1	279	128	2021-03-30	40
on2_2_2	old nest	4	2	281	96	2021-03-30	41
on2_3_1	old nest	20	1	269	88.9	2021-03-30	42
on2_3_2	old nest	20	2	265	131	2021-03-30	43
fs1_2_1	feeding stations	4	1	288	74.5	2021-03-30	44
fs1_2_2	feeding stations	4	2	259	50.7	2021-03-30	45
fs1_3_1	feeding stations	20	1	289	36.3	2021-03-30	46
fs1_3_2	feeding stations	20	2	262	32.8	2021-03-30	47
fs2_2_1	feeding stations	4	1	260	2021-09-21	2021-03-30	48
fs2_2_2	feeding stations	4	2	288	2021-06-21	2021-03-30	49
ct5	negative control	NA	NA	NA	<0.010	2021-03-30	50
