# Supplementary material for: Non-invasive real-time genomic monitoring of the critically endangered kākāpō
Source: eLife. 2023 Dec 28;12:RP84553. doi: 10.7554/eLife.84553 (PMC10754495; doi:10.7554/eLife.84553)
Supplement: Supplementary file 2. — All reads, reads that could be classified, reads that map to any Metazoan taxa, and reads that mapped to the taxonomic species level. [file elife-84553-supp2.xlsx]

## Sheet: Sheet1
Sample label	All reads	Classified reads	Metazoan reads	Species-level reads
1	2637	2522	2390	1937
2	1668	1668	1668	1374
3	2544	2475	2475	2280
4	1438	1438	1438	1128
5	754	754	754	640
6	0	0	0	0
7	1715	1689	1689	616
8	98	98	98	98
9	175	175	175	175
10	72	72	72	72
11	1888	1888	1888	1829
12	1050	1050	1050	1050
14	712	712	712	683
16	0	0	0	0
17	1830	1830	1830	1404
18	661	635	635	402
19	1956	1956	1956	1614
20	0	0	0	0
21	56	56	56	0
22	769	734	734	503
23	0	0	0	0
24	0	0	0	0
25	1998	1631	1631	1405
26	2183	2183	2151	1053
27	2175	1238	1238	1001
28	1772	1120	1120	1011
29	1415	1333	1333	892
30	1565	1447	1447	743
31	1167	1167	1167	1167
32	1082	980	980	195
33	278	229	229	141
34	467	396	396	376
35	2780	2737	2737	2695
36	1155	1084	1084	510
37	1687	1414	1414	127
38	1817	1629	1629	586
39	0	0	0	0
40	406	406	359	359
41	163	115	115	0
42	237	203	162	70
43	260	236	200	172
44	539	498	467	76
45	752	729	729	561
46	369	343	310	273
47	755	733	647	613
48	20	20	20	0
49	232	209	209	0
50	0	0	0	0
